# Supplementary material for: Realization of on-tissue protein identification by highly efficient in situ digestion with graphene-immobilized trypsin for MALDI imaging analysis
Source: Royal Society of Chemistry journal article supplement (doi:10.1039/c3an36391k), 2013-01-01
Supplement: c3an36391k.pdf [file c3an36391k.pdf]

1  
2  
3  
4  
5  
6  
7  
8  
9  
10  
11  
12  
13  
14  
15  
16  
17  
18  
19  
20  
21  
22  
23  
24

## Supporting Information

### Realization of on-tissue protein identification by highly efficient in-situ digestion with graphene-immobilized trypsin for MALDI Imaging analysis

*Jing Jiao,<sup>a,‡</sup> Aizhu Miao,<sup>b,‡</sup> Xinyan Zhang,<sup>b</sup> Yan Cai,<sup>a</sup> Yi Lu,<sup>b</sup> Ying Zhang,<sup>\*a</sup> and Haojie Lu<sup>\*a</sup>*

<sup>a</sup> Department of Chemistry and Institutes of Biomedical Sciences, Fudan University, 200433 Shanghai, China

<sup>b</sup> Department of Ophthalmology, Eye & ENT Hospital of Fudan University, 200031 Shanghai, China

<sup>‡</sup> Jing Jiao and Aizhu Miao contributed equally to this work.

1 **This file includes:**

2 **Experimental Section**

3 **Fig S1 to S11**

4 **Table S1,S2,S3**

5

6

7

8

9

10

11

12

13

14

15

16

17

18

19

20

21

22

## 1 **Experimental Section**

2

### 3 **Materials and chemicals**

4

5 Graphene oxide powder was purchased from Nanjing XFNANO Materials Tech  
6 Co., Ltd.  $\alpha$ -Cyano-4-hydroxycinnamic acid ( $\alpha$ -CHCA), 2,5-Dihydroxybenzoic acid  
7 (DHB), Tosylphenylalanine chloromethyl-ketone (TPCK)-treated trypsin, Myoglobin  
8 from equine heart (Myo), Bovine serum albumin (BSA), alpha-casein ( $\alpha$ -casein) from  
9 bovine milk, ammonium bicarbonate (ABC), acetonitrile (ACN) were purchased from  
10 Sigma Chemical (St. Louis, MO, USA). Water was purified using a Milli-Q system  
11 (Millipore, Molsheim, France). Trifluoroacetic acid (TFA) was purchased from Merck  
12 (Darmstadt, Germany). Ethanol of analytical grade and was purchased from Shanghai  
13 Chemical Reagent Company (Shanghai, China). Unless noted otherwise, other  
14 chemicals and analytically pure reagents were used as received. An aqueous solution  
15 of GO was prepared by transferring the powder to a 1.5 mL-Eppendorf tube and  
16 suspending in water. The stock solution was stored at room temperature and used for  
17 further experiments. The trypsin was suspended in 0.1% (v/v) TFA, reaching a  
18 concentration of 2 mg mL<sup>-1</sup> and was stored at -20 °C.

19

### 20 **Characterization of graphene oxide**

21 Transmission electron microscopy (TEM) images were taken with a JEOL 2011  
22 microscope (Japan) operating at 200 kV. The characterization data including SEM,  
23 TEM, AFM and UV-vis absorption spectra of commercial graphene oxide were  
24 provided by the manufacturer.

25

### 26 **Enzyme immobilization**

27 Before immobilization, stock solution of trypsin and yellow-brown aqueous  
28 suspension of GO was diluted in phosphate buffer to the desirable concentration. In a

1 typical immobilization experiment, GO solution was incubated with enzyme solution  
2 at certain concentrations for a period of time at room temperature. This solution was  
3 centrifuged at 16400 rpm for 5 min and the resulting supernatant was collected.  
4 Enzyme loading on GO was measured by the difference in the amount of total enzyme  
5 used and residual enzyme in the supernatant after immobilization. The bicinchoninic  
6 acid method was used to determine the enzyme concentration by measuring the UV  
7 absorbance at 562 nm. For accurate calculation of the amount of immobilized enzyme,  
8 a calibration curve was obtained at  $\lambda=562$  nm by using a series of standard protein  
9 solution with different concentrations. To study the effect of pH, phosphate buffer  
10 with different pH was prepared and used as the incubation buffer during  
11 immobilization. The succeeding adsorption procedure was the same as described  
12 before.

### 13 **Digestion of standard proteins**

14 Three proteins, Myo, BSA and  $\alpha$ -casein were used for digestion by immobilized  
15 enzyme and free enzyme. Before digestion, proteins were diluted in 25mM ABC  
16 buffer (pH 8.1), to a concentration of  $10 \text{ ng } \mu\text{L}^{-1}$ . For on-plate digestion, each protein  
17 solution (1  $\mu\text{L}$ ) was spotted on the MALDI plate. **To simulate the on-tissue digestion,**  
18 **all the drops of protein were dried before digestion. Either the immobilized or the free**  
19 **enzyme was diluted with the 25 mM ABC buffer (pH 8.1) and deposited on the**  
20 **MALDI plate with several cycles of aspirating and dispensing.** The MALDI plate was  
21 placed at room temperature. While the enzyme solution is slowly drying, the digestion  
22 can be performed directly on the plate. 0.5  $\mu\text{L}$  CHCA matrix (in 50% ACN containing  
23 0.1% TFA) for Myo and BSA or 0.5  $\mu\text{L}$  DHB matrix (in 50% ACN containing 0.1%  
24 TFA) for  $\alpha$ -casein was dropped and dried before mass analysis.

### 25 **Tissue preparation**

26 Normal human lenses were obtained from the eye bank of Eye and ENT Hospital  
27 of Fudan University and stored at  $-80$  °C. The research followed the tenets of the

1 Declaration of Helsinki and was approved by the Ethics Committee of Eye and ENT  
2 Hospital of Fudan University.

3 Frozen human lenses were attached to specimen chucks with the aid of a small  
4 amount of optimal cutting temperature (OCT) embedding medium. When the tissue  
5 was cryosectioned into 14- $\mu$ m-thick sections at -18 °C using a Leica cryostat (Leica  
6 CM3050S, Leica Microsystems Inc, Wetzlar, Germany), the lens were cut in parallel  
7 with the equatorial plane but the cryostat blade never contacted the OCT in order to  
8 avoid the background interference. Then the sections were mounted onto glass slides.

9 Several circles of ACN-water solution (50:50, v/v) spray were applied resulting  
10 in a tightly bound section.

11

## 12 **On tissue digestion of crystallins**

13 Crystallin tissue slices were mounted onto glass slides and washed successively  
14 for 60s each in 50%, 75%, and 100% ethanol. The washing step facilitated uniform  
15 matrix crystal formation across the entire lens section by removing the interfering  
16 species such as salts and lipids. Afterward, the crystallins tissue slice was immobilized  
17 on the MALDI plate by conductive adhesive. Immobilized trypsin solution (1.5  $\mu$ L,  
18 diluted in 25 mM ABC) was deposited on the tissue slice. Several cycles of aspirating  
19 and dispensing were not desirable during on tissue digestion which would lead to the  
20 delocalization of the protein easily. The MALDI plate was then placed in a home-built  
21 humidity chamber, made from a plastic box with wet paper tissues in the bottom and a  
22 tight-fitting lid, and incubated at 37 °C for 10 min. CHCA matrix (in 50% ACN  
23 containing 0.1% TFA) was sprayed by a pneumatic TLC sprayer on the tissue before  
24 mass analysis.

## 25 **MALDI-TOF MS Process**

26 Matrix-assisted laser desorption/ionization (MALDI) mass spectra were acquired

1 in reflection mode between  $m/z$  700 and 4000 on a 5800 Proteomics Analyzer  
2 (Applied Biosystems, Framingham, MA, USA) with a Nd:YAG laser at 355 nm, a  
3 repetition rate of 200 Hz, and an acceleration voltage of 20 kV. GPS Explorer  
4 software from Applied Biosystems, with Mascot as a search engine and SwissProt  
5 (Version 050303) as a database, was employed for protein identification. The peptide  
6 mass tolerance was set to 80 ppm.

7

## 8 **MSI acquisition and data processing**

9 After digestion and matrix coating, the plates were analyzed in 5800 Proteomics  
10 Analyzer (Applied Biosystems, Framingham, MA, USA) using 4800 imaging  
11 software. Mass conditions were set as described above. Images were performed in the  
12 positive reflection mode, and MALDI-MS spectra were acquired in the  $m/z$  range of  
13 900-3500. Two-dimensional ion density maps were created using the image  
14 reconstruction software (BioMap, Novartis, Basel, Switzerland)

15

16

17

18

19

20

21

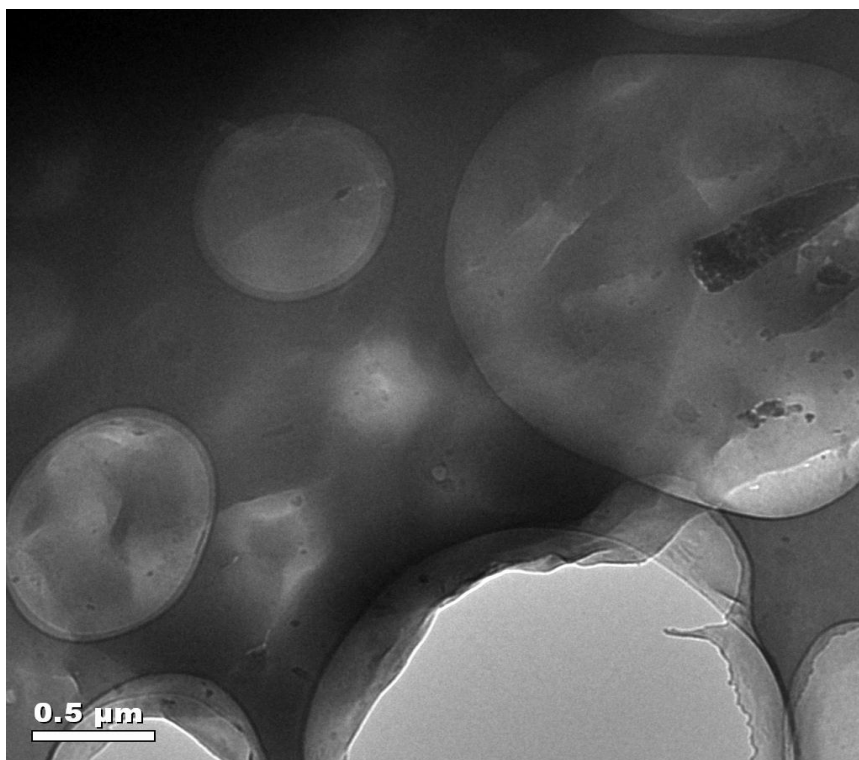

1

2 **Fig. S1.** TEM image of graphene oxide

3

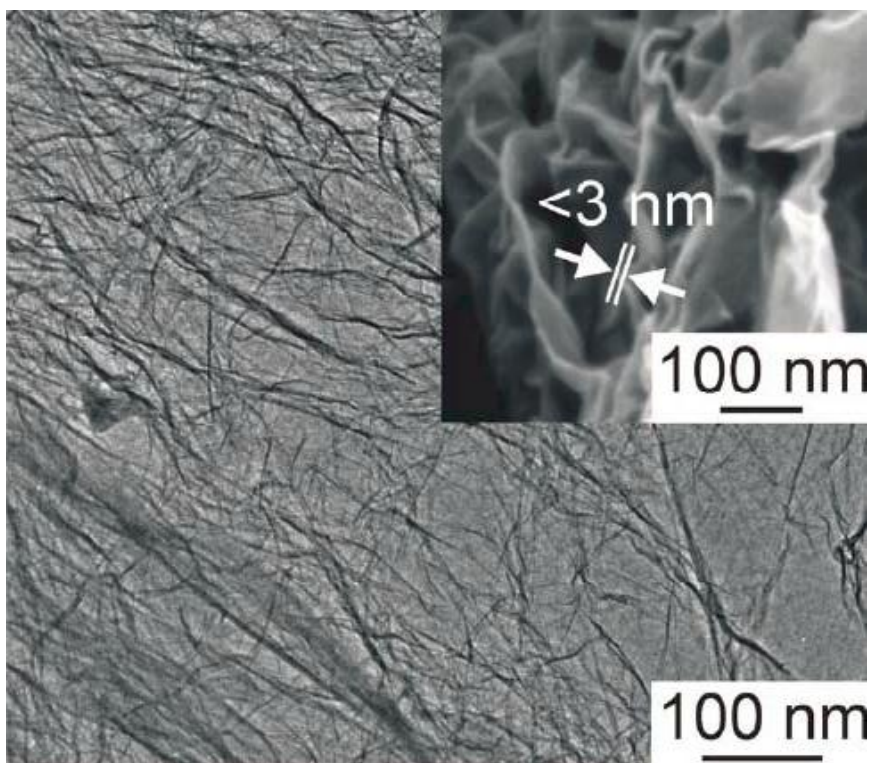

4

5 **Fig. S2.** TEM and SEM ( inline ) image of graphene oxide provided by manufacturer

6

1 **The TEM and SEM show that the commercial graphene oxide was exfoliated to**  
2 **individual nanosheets. SEM image ( inline ) indicates that the graphene sheets**  
3 **were thinner than 3 nm**

4  
5

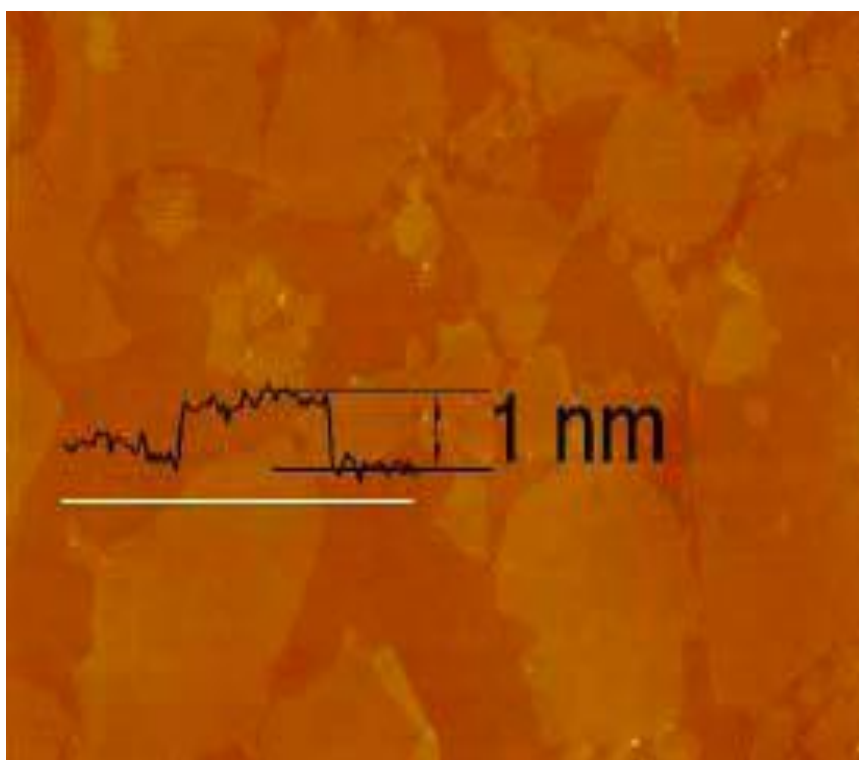

6

7 **Fig. S3.** AFM image of graphene oxide provided by manufacturer

8

9 **As shown in Fig. S3, the height of the commercial graphene oxide sheets is about**  
10 **1 nm, which confirms that they are monolayer graphene oxide, and in solution,**  
11 **they exist primarily as exfoliated single sheets.**

12



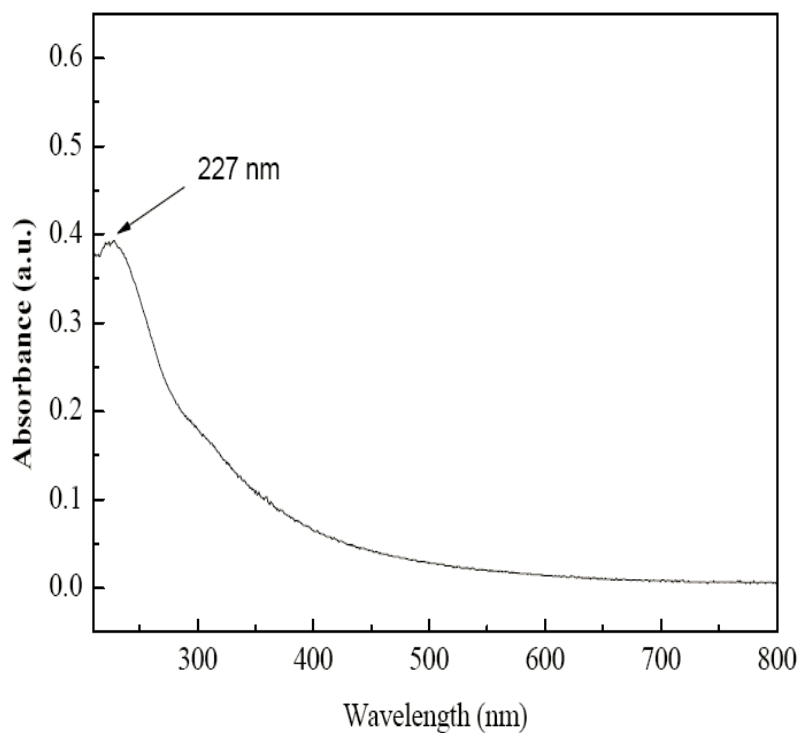

1

2 **Fig. S4.** UV-vis absorption spectra of graphene oxide provided by manufacturer

3

4 **An absorption peak at 227 nm was observed at the commercial grapheme oxide,**  
5 **which was in accordance with the previous result reported.( J. Mater. Chem.**  
6 **2012, 22, 8426; Electrochimica Acta. 2011, 56, 8168)**

7

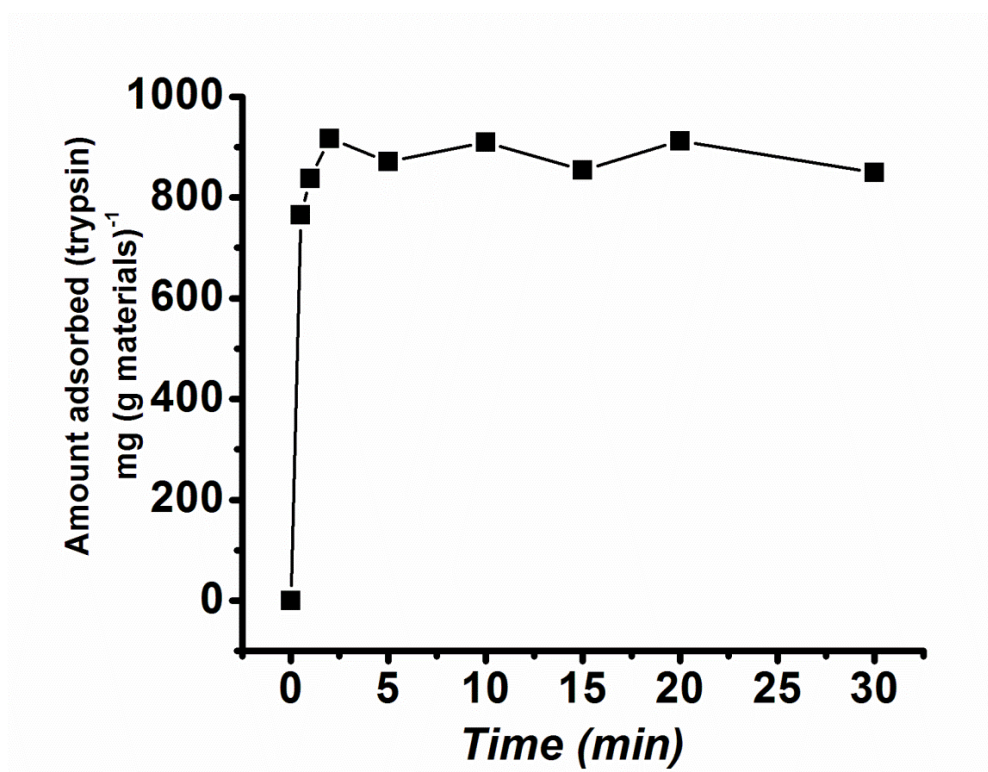

1

2 **Fig. S5.** Adsorption of trypsin on GO as a function of time.

3 As Fig. S5. showed, nearly 90% of the maximum adsorption amount can be

4 reached in 1 min.

5

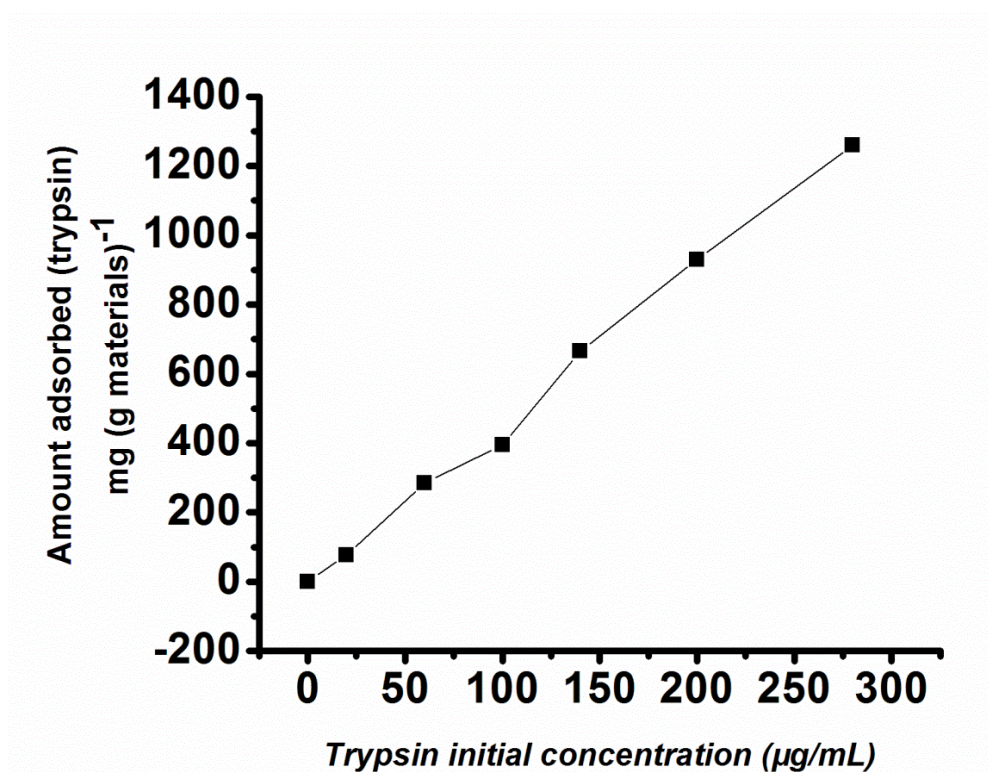

1

2 **Fig. S6.** Effect of the initial concentration of trypsin on the enzyme loading on GO.

3 **When the initial concentration of the enzyme increased from 0.787  $\mu\text{M}$  to 7.87**

4  **$\mu\text{M}$ , the total amount of trypsin adsorbed increased from 72  $\mu\text{g mg}^{-1}$  to 930  $\mu\text{g}$**

5  **$\text{mg}^{-1}$ .**

6

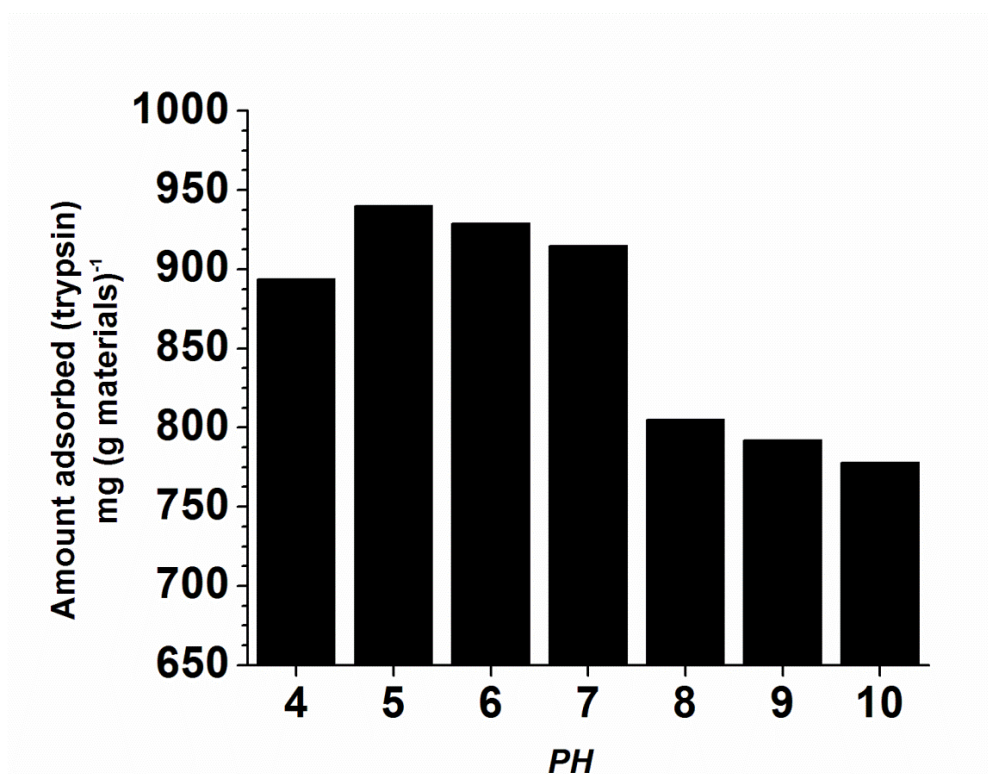

1

2 **Fig. S7.** Effect of pH on the adsorption of trypsin on GO

3 When the pH value of the buffer was higher than 7, the loading amount of  
4 trypsin decreased dramatically. It is well known that GO is negatively charged in  
5 aqueous solution with a pH value ranging from 4 to 11. Thus when the pH value  
6 of the incubation buffer was between 4 and 7, the positively charged surface of  
7 trypsin was favorable to an interaction with GO. However, when the pH value of  
8 the buffer was higher than 8, both the trypsin and GO had a negative charge.  
9 The loading capacity was limited as a result of repulsive interactions. Therefore,  
10 in the later immobilization operation, a buffer with a pH value between 5 and 6  
11 will be chosen for the maximum enzyme loading amount.

12

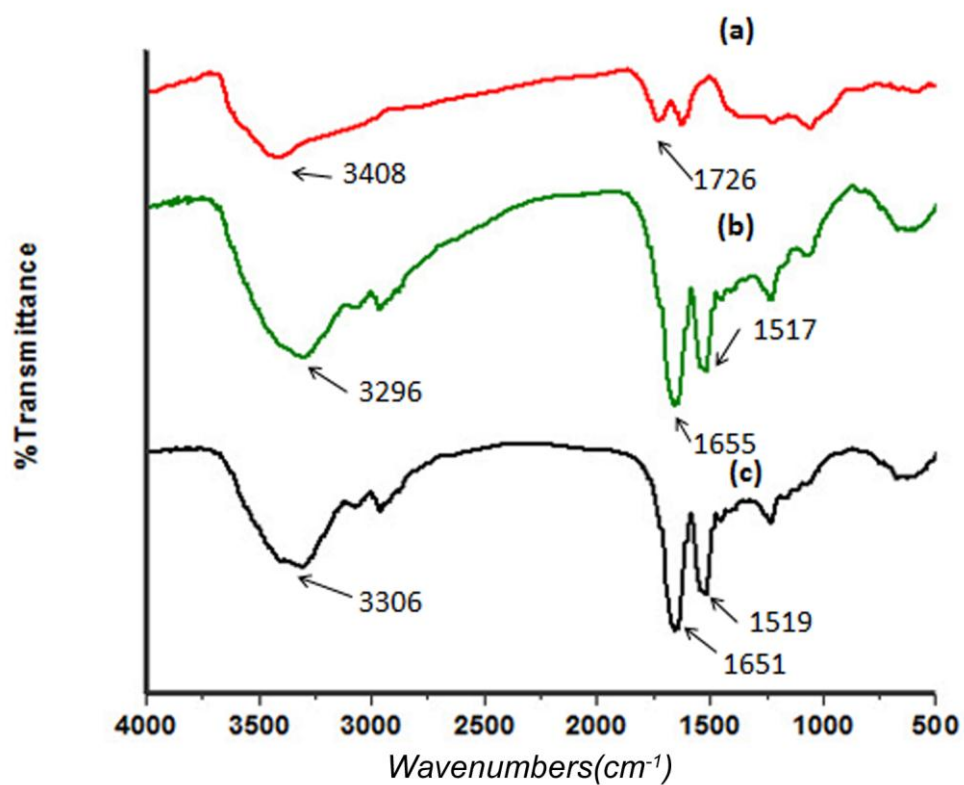

1

2 **Fig. S8.** FT-IR spectra of (a) GO, (b) trypsin and (c) GO-immobilized trypsin

3

4

5

6

7

8

9

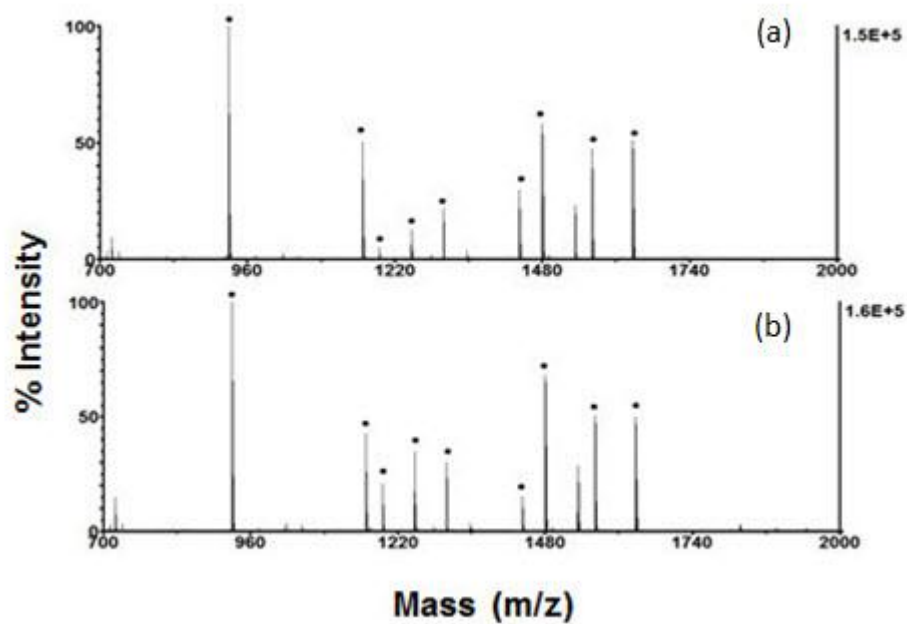

1

2 **Fig. S9.** MALDI-TOF mass spectra of 5 ng  $\mu\text{L}^{-1}$  BSA digests (a) with and (b) without  
3 GO

4 **There were no obvious differences between the two spectra in signal intensity.**

5 **The mass spectra illustrated that the existence of GO did not interfere with the**

6 **MS analysis.**

7

8

9

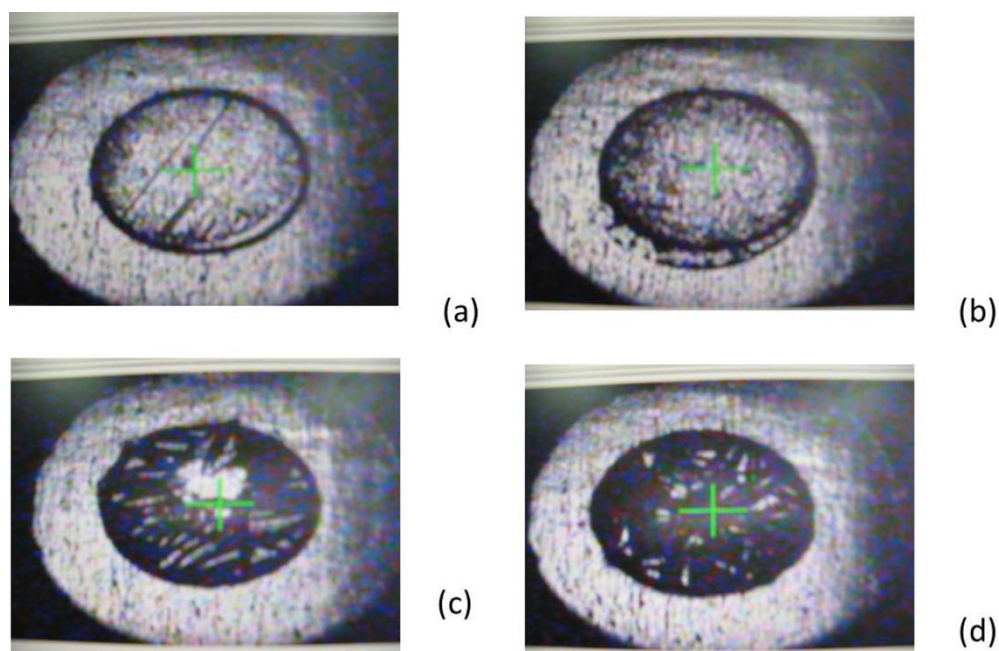

1

2 **Fig S10.** Digital photographs of prepared sample spots of Myo digests with (b) (d)  
3 and without (a) (c) GO. On each spot,  $0.5 \mu\text{L}^{-1}$  Myo sample solution and  $0.5 \mu\text{L}^{-1}$   
4 matrix solution CHCA (a) (b) or DHB (c) (d) were spotted and mixed together on the  
5 spot with pipette.

6 **Photographs showed that the crystal formations of (a) and (b) had no obvious**  
7 **differences. Similarly, the crystal formations of (c) and (d) were almost the same.**  
8 **Both illustrated that the existence of GO did not interfere with the formation of**  
9 **matrix and analyte crystals.**

10

11

12

13



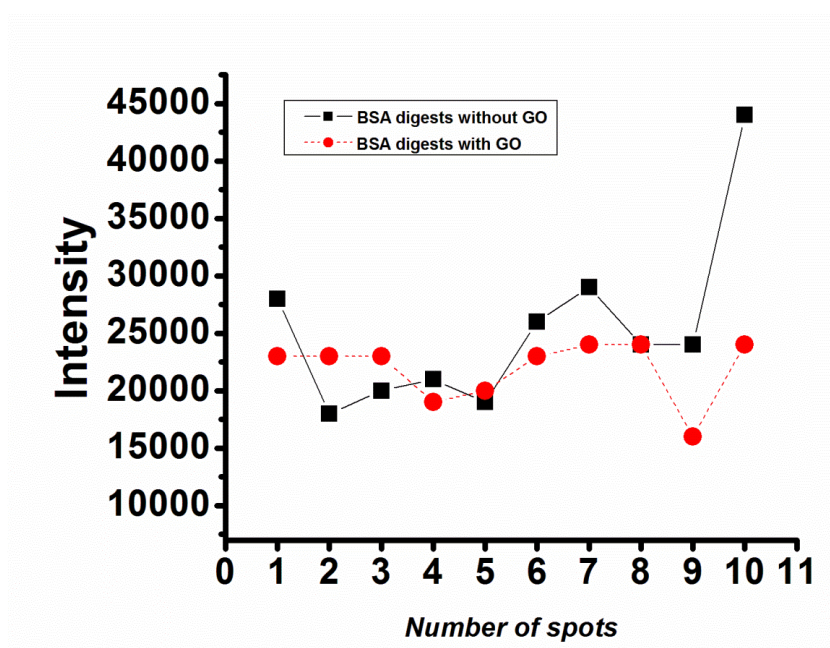

1

2 **Fig. S11.** Comparison of peak intensity stability of 10 ng  $\mu\text{L}^{-1}$  BSA digests with and  
3 without GO

4 **Each sample spot were prepared by applying 1  $\mu\text{L}$  mixture solution of bovine**  
5 **serum albumin peptides (red circle) with and (black square) without graphene**  
6 **oxide to each spot on the sample plate. The mass spectra were acquired from a**  
7 **discrete location in each spot by applying continuous stage motion of 200 laser**  
8 **shots for each mass spectrum and 50 sub-spectra pass acceptance. The red circle**  
9 **illustrated in Fig. S11, indicating that better shot-to-shot reproducibility of mass**  
10 **spectrometry signals of the bovine serum albumin peptides mixed with GO.**  
11 **Similarly, each black square represented mass spectrometry signal intensity of**  
12 **bovine serum albumin peptides without graphene oxide from individual spot. We**  
13 **can see that without the help of graphene oxide the signal intensity had a huge**  
14 **variance. Therefore ,GO contributed to better shot-to-shot reproducibility.**



1 **Table S1.** Comparison of amino acid sequence coverage of

2 On-Plate digestion with GO-IMER and free enzyme

| Digestion method | Myoglobin % | BSA % | $\alpha$ -casein % |
|------------------|-------------|-------|--------------------|
| GO-IMER          | 77          | 30    | 57                 |
| Free enzyme      | 30          | ND*   | ND*                |

3 \* The protein is not identified.

4

**Table S2.** Comparison of protein score and amino acid sequence coverage of on-Plate digestion

6 with free enzyme and GO-IMER

| Protein              | concentration             | Score       |         | Protein sequence coverage |         |
|----------------------|---------------------------|-------------|---------|---------------------------|---------|
|                      |                           | Free enzyme | GO-IMER | Free enzyme               | GO-IMER |
| alpha-casein         | 100 ng $\mu\text{L}^{-1}$ | 56          | 102     | 53%                       | 53%     |
|                      | 50 ng $\mu\text{L}^{-1}$  | 62          | 91      | 50%                       | 69%     |
|                      | 25 ng $\mu\text{L}^{-1}$  | 44          | 71      | 53%                       | 58%     |
| bovine serum albumin | 100 ng $\mu\text{L}^{-1}$ | 60          | 79      | 33%                       | 48%     |
|                      | 50 ng $\mu\text{L}^{-1}$  | 83          | 107     | 35%                       | 48%     |
|                      | 25 ng $\mu\text{L}^{-1}$  | 74          | 105     | 35%                       | 52%     |

7

**Table S3.** Peptides detected in human lens sections after in-situ digestion.

| Measured proteins in tissue         | Observed MH <sup>+</sup> | Calculated MH <sup>+</sup> | Peptide source                     | Miss cleavage               | Peptide                    |
|-------------------------------------|--------------------------|----------------------------|------------------------------------|-----------------------------|----------------------------|
| $\alpha$ A-crystallins              | 744.12                   | 744.39                     | $\alpha$ A-(113-117)               | 1                           | EFHRR                      |
|                                     | 1599.26                  | 1599.81                    | $\alpha$ A-(1-12)                  | 1                           | MDVTIQHPWFKR               |
|                                     | 1037.33                  | 1037.54                    | $\alpha$ A-(13-21)                 | 0                           | TLGPFYPSR                  |
|                                     | 1175.37                  | 1175.63                    | $\alpha$ A-(55-65)                 | 0                           | TVLDSGISEVR                |
|                                     | 1655.51                  | 1655.86                    | $\alpha$ A-(100-112)               | 1                           | AIPVSREEKPTSAPSS           |
| $\alpha$ B-crystallins              | 700.30                   | 700.44                     | $\alpha$ B- (158-163)              | 0                           | TIPITR                     |
|                                     | 900.43                   | 900.49                     | $\alpha$ B- (150-157)              | 1                           | KQVSGPER                   |
|                                     | 1716.52                  | 1716.90                    | $\alpha$ B- (93-107)               | 1                           | VLGDVIEVHGKHEER            |
|                                     | 1821.65                  | 1822.04                    | $\alpha$ B- (158-174)              | 1                           | TIPITREEKPAVTAAPK          |
|                                     | 1944.55                  | 1944.07                    | $\alpha$ B- (91-107)               | 2                           | VKVLGDVIEVHGKHEER          |
|                                     | 2703.04                  | 2703.52                    | $\alpha$ B-(150-174)               | 3                           | KQVSGPERTIPITREEKPAV TAAPK |
|                                     | 2831.14                  | 2831.61                    | $\alpha$ B- (151-175)              | 3                           | QVSGPERTIPITREEKPAVT AAPKK |
|                                     |                          | $\alpha$ B- (150-175)      | 4                                  | KQVSGPERTIPITREEKPAV TAAPKK |                            |
| $\beta$ A <sub>2</sub> -crystallins | 1037.33                  | 1037.54                    | $\beta$ A <sub>2</sub> -(13-21)    | 0                           | TLGPFYPSR                  |
|                                     | 1457.70                  | 1457.67                    | $\beta$ A <sub>2</sub> -(108-120)  | 0                           | VTLFEGDNFQGCK              |
|                                     | 1481.43                  | 1481.67                    | $\beta$ A <sub>2</sub> -(27-39)    | 1                           | CRLLSDCANVCER              |
|                                     | 1655.51                  | 1655.86                    | $\beta$ A <sub>2</sub> -(100-112)  | 1                           | AIPVSREEKPTSAPSS           |
| $\beta$ A <sub>3</sub> -crystallins | 1503.47                  | 1503.76                    | $\beta$ A <sub>3</sub> - (110-122) | 0                           | LMSFRPICSANHK              |
|                                     | 1584.50                  | 1584.78                    | $\beta$ A <sub>3</sub> - (18-32)   | 0                           | MAQTNPTPGSLGPWK            |
|                                     | 1727.46                  | 1727.85                    | $\beta$ A <sub>3</sub> -(197-211)  | 0                           | EWGSHAQTSQIQSIR            |
|                                     | 1857.51                  | 1856.96                    | $\beta$ A <sub>3</sub> - (123-137) | 2                           | ESKMTIFEKENFIGR            |

|                                     |         |         |                                    |   |                     |
|-------------------------------------|---------|---------|------------------------------------|---|---------------------|
| $\beta$ B <sub>1</sub> -crystallins | 1087.34 | 1087.55 | $\beta$ B <sub>1</sub> - (51-60)   | 0 | AAELPPGNYS          |
|                                     | 1568.26 | 1568.78 | $\beta$ B <sub>1</sub> - (111-123) | 1 | GEMFILEKGEYPR       |
| $\beta$ B <sub>2</sub> -crystallins | 1269.17 | 1269.63 | $\beta$ B <sub>2</sub> -(164-175)  | 1 | EEKPAVTAAPKK        |
|                                     | 1269.35 | 1269.63 | $\beta$ B <sub>2</sub> - (190-198) | 1 | IRDMQWHQR           |
|                                     | 1311.40 | 1311.67 | $\beta$ B <sub>2</sub> - (146-157) | 0 | IQTGLDATHAER        |
|                                     | 1426.42 | 1426.76 | $\beta$ B <sub>2</sub> - (161-172) | 1 | GLQYLLEKGDYK        |
| $\beta$ B <sub>3</sub> -crystallins | 815.57  | 815.48  | $\beta$ B <sub>3</sub> - (196-201) | 2 | RIRDQK              |
|                                     | 1729.51 | 1729.83 | $\beta$ B <sub>3</sub> - (153-167) | 0 | AINGTWVGYEFPGYR     |
| $\gamma$ A -crystallins             | 2398.80 | 2399.26 | $\gamma$ A-(81-99)                 | 3 | IIPHTSSHKLRLYERDDYR |
| $\gamma$ C -crystallins             | 1612.48 | 1612.84 | $\gamma$ C-(78-91)                 | 1 | SCCLIPQTVSHRLR      |
| $\gamma$ D -crystallins             | 909.42  | 909.47  | $\gamma$ D- (4-10)                 | 0 | ITLYEDR             |
|                                     | 1248.58 | 1248.71 | $\gamma$ D- (164-174)              | 2 | VGSLRRVIDFS         |
|                                     | 1255.64 | 1255.61 | $\gamma$ D- (143-152)              | 0 | QYLLMPGDYR          |
|                                     | 1454.51 | 1454.74 | $\gamma$ D- (4-15)                 | 1 | ITLYEDRGRGFQGR      |
| $\gamma$ S -crystallins             | 891.22  | 891.41  | $\gamma$ S- (73-79)                | 0 | WMGLNDR             |
|                                     | 1120.50 | 1120.65 | $\gamma$ S- (147-155)              | 2 | GRQYLLDKK           |
|                                     | 1355.64 | 1355.73 | $\gamma$ S- (149-158)              | 2 | QYLLDKKEYR          |
|                                     | 1568.26 | 1568.85 | $\gamma$ S- (147-158)              | 3 | GRQYLLDKKEYR        |
|                                     | 1729.31 | 1729.90 | $\gamma$ S-(159-174)               | 0 | KPIDWGAASPAVQSFR    |

---
